# Supplementary material
Source: PubMed Central journal article supplement (PMC5015809)
Supplement: supp_nsw060_scan-16-047-File006.pdf [file supp_nsw060_scan-16-047-File006.pdf]

## SUPPLEMENTARY MATERIAL

### Supplementary Table 1

#### *Behavioral Performance and Post-test Questionnaire Ratings for the Control Behavioral Experiment*

|                                        | Live          | Social       | Standard      | $F_{(2,36)}$ | Pairwise Comparisons |
|----------------------------------------|---------------|--------------|---------------|--------------|----------------------|
| <b>BEHAVIORAL PERFORMANCE</b>          |               |              |               |              |                      |
| Accuracy (%)                           | 84.72 (11.16) | 82.87 (19.3) | 86.57 (11.12) | .442         | Live=Soc=Std         |
| RT (ms)                                | 1384 (244)    | 1421 (360)   | 1438 (312)    | .348         | Live=Soc=Std         |
| <b>POST-TEST QUESTIONNAIRE RATINGS</b> |               |              |               |              |                      |
| Liveness                               | 3.42 (.95)    | 3.13 (.85)   | 2.39 (.88)    | 9.89***      | Live=Soc>Std         |
| Likeability                            | 3.84 (1.07)   | 4.00 (1.20)  | 3.39 (1.12)   | 2.02         | Live=Soc=Std         |
| Engagement                             | 4.58 (.61)    | 4.47 (.77)   | 4.16 (.83)    | 2.11         | Live=Soc=Std         |

*Note:* Values are mean (standard deviation). Due to a technical error, task data were not recorded for one participant, resulting in N=18 for accuracy and RT measures and N=19 for post-test ratings. All post-test questionnaire ratings are based on items scored on a 1 to 5 scale. The control study had a 3s response window due to timing constraints at the behavioral session. Post-hoc pairwise comparisons were made using a Tukey's test with an alpha of .05. \*\*\*,  $p < .001$ . Soc=Social; Std=Standard.

## Control Comparison

Right STG

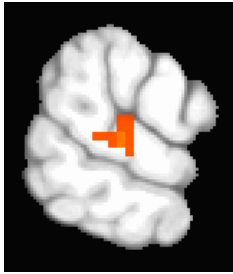

x=65

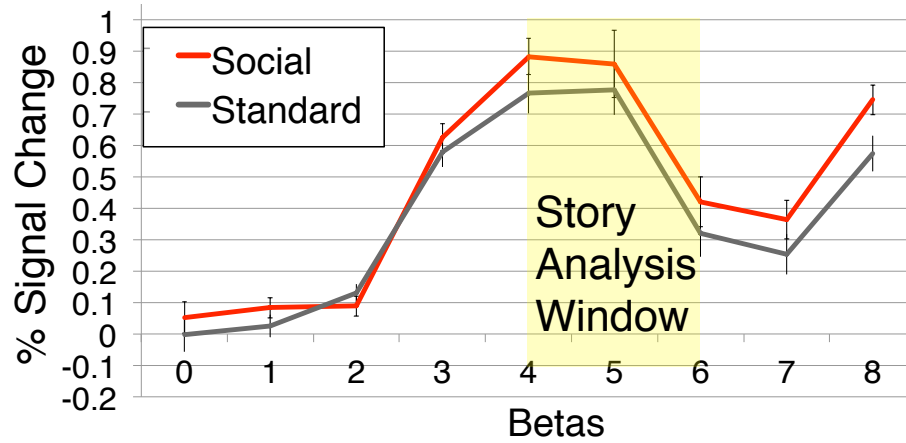

*Supplementary Figure 1.* Time series plot for a selected cluster defined from group-level comparison of the two recorded speech conditions. Individual spline estimates are depicted for a region active for the Social > Standard comparison in the Story Window (Betas 4-6; voxel-wise correction of  $p < .01$  and cluster correction of  $p < .05$ ). Error bars represent standard error of the mean. s=seconds; STG=superior temporal gyrus.

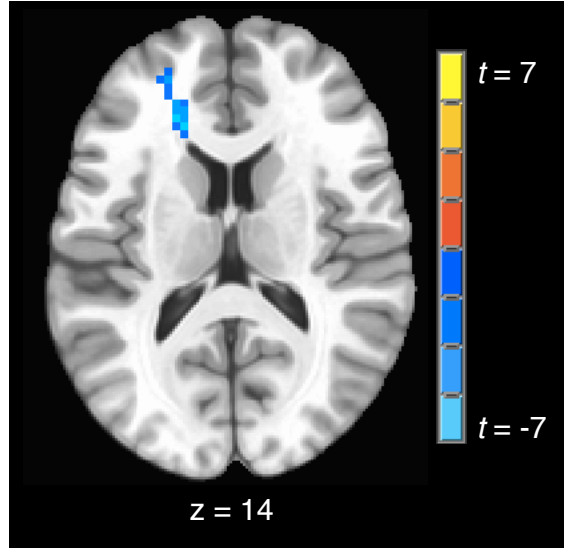

*Supplementary Figure 2.* Whole-brain analysis examining the relation between age and the magnitude of the Live > Social contrast. Using a voxel-wise correction of  $p < .01$  and cluster correction of  $p < .05$ , a single significant cluster was identified. This cluster demonstrated a negative relation between age and sensitivity to live speech.
